# Supplementary material for: Feline Oral Squamous Cell Carcinoma: A Critical Review of Etiologic Factors
Source: MDPI journal article supplement (doi:10.3390/vetsci9100558), 2022-10-11
Supplement: s1 [file s1]

*Supplementary Material*

## **Feline Oral Squamous Cell Carcinoma: A Critical Review of Etiologic Factors**

**Inês Sequeira, Maria dos Anjos Pires, José Leitão , Joaquim Henriques, Carlos Viegas and João Requicha**

**Table S1.** Grading system used to score the quality of experimental design for manuscripts included in this systematic review, modified from a grading system published by the Oxford Centre for Evidence-based Medicine.

| Experimental design grade (EDG) | Study types                                                        |
|---------------------------------|--------------------------------------------------------------------|
| I                               | Randomized, controlled, double-blinded prospective clinical trials |
| II                              | Prospective clinical trials                                        |
| III                             | Retrospective case series, (n > 10)                                |
| IV                              | Retrospective case series (n < 10)                                 |
| V                               | Single patient case report; expert opinion                         |

**Table S2.** Data collection related to viruses.

| Reference                           | Geographic location | Level of evidence | Cats with FOSCC (n) | Breed (n)                     | Gender (n)                 | Animals' lifespan (n)                             | Virus (% positive)                                                                          | Diagnostic test                                   |
|-------------------------------------|---------------------|-------------------|---------------------|-------------------------------|----------------------------|---------------------------------------------------|---------------------------------------------------------------------------------------------|---------------------------------------------------|
| Chu <i>et al.</i> , 2019 [34]       | USA                 | III               | 20                  | ND                            | M (10)<br>F (10)           | AdMa (8)<br>G (12)                                | FcaPV-3 (5%)<br>FFV (35%)<br>FTTV (10%)<br>EBV (5%)<br>FHV-1 (10%)<br>FeLV (0%)<br>FIV (0%) | ViroCap, PCR (only on EBV and FcaPV – 3 positive) |
| Gendler <i>et al.</i> , 2010[47]    | USA                 | III               | 18                  | ES (14)<br>H (2)<br>MC (2)    | M (7)<br>F (11)            | 13.2 ± 3.5                                        | FIV (0%)<br>FeLV (0%)                                                                       | Only referred sanitary status                     |
| Yamashita <i>et al.</i> , 2018 [32] | Japan               | IV                | 8                   | ES (8)                        | M (4)<br>F (4)             | Sen (5)<br>G (3)                                  | FcaPV-2 (0%)<br>FcaPV-3 (0%)<br>FcaPV-4 (0%)                                                | PCR; IHC p16                                      |
| Altamura <i>et al.</i> , 2020 [35]  | Italy               | III               | 32                  | ES (18)<br>Per (1)<br>SI (13) | M (6)<br>F (15)<br>ND (11) | Ad (1)<br>AdMa (5)<br>Sen (6)<br>G (1)<br>SI (19) | FcaPV-2 (31,3%)                                                                             | PCR; IHC (only on PV-positive)                    |
| O'Neill <i>et al.</i> , 2011 [24]   | USA                 | IV                | 2                   | ES (1)<br>H (1)               | M (1)<br>F (1)             | AdMa 1)<br>G (1)                                  | HVP-38 (25%)<br>PV (25%)                                                                    | PCR                                               |
| Munday <i>et al.</i> , 2009 [29]    | New Zealand         | III               | 20                  | EC (1)<br>SI (19)             | ND                         | AdMa (1)<br>ND (19)                               | PV (5%)                                                                                     | PCR                                               |

|                                    |             |     |                 |                                               |                  |                                                   |                                |                                                |
|------------------------------------|-------------|-----|-----------------|-----------------------------------------------|------------------|---------------------------------------------------|--------------------------------|------------------------------------------------|
| Munday <i>et al.</i> , 2011 [30]   | New Zealand | III | 30              | ND                                            | ND               | 12.8                                              | PV (0%)                        | PCR; IHC p16                                   |
| Altamura <i>et al.</i> , 2018 [27] | Italy       | IV  | 1               | EC (1)                                        | ND               | Sen (1)                                           | FcaPV-2 (100%)                 | PCR; IHC p53 and E6AP                          |
| Munday <i>et al.</i> , 2015 [17]   | New Zealand | III | 36              | ND                                            | ND               | AdMa (1)<br>Ad (1)<br>SI (34)                     | FcaPV-1 (2.8%)<br>FcaPV-4 (0%) | PCR; IHC p16 (only on FcaPV-1 positive)        |
| Munday <i>et al.</i> , 2019[23]    | New Zealand | III | 52              | ND                                            | M (32)<br>F (20) | 13.5                                              | PV (0%)                        | IHC p16 and p53 and PCR (only on p16-positive) |
| Hoggard <i>et al.</i> , 2018 [33]  | USA         | IV  | 1               | EC (1)                                        | ND               | Sen (1)                                           | FcaPV-2 (0%)                   | PCR; ISH                                       |
| Anis <i>et al.</i> , 2010[36]      | USA         | IV  | 1               | ND                                            | ND               | ND                                                | HVP-38 (100%)                  | PCR                                            |
| Hutson <i>et al.</i> , 1991[72]    | USA         | IV  | 18 <sup>a</sup> | ND                                            | ND               | ND                                                | FIV (22.2%)                    | PCR                                            |
| Supsavhad <i>et al.</i> , 2016[31] | USA         | III | 43              | ES (37)<br>H (3)<br>S (1)<br>Per (1)<br>A (1) | M (16)<br>F (27) | J (1)<br>Ad (3)<br>AdMa (5)<br>Sen (20)<br>G (13) | PV (0%)                        | IHC; PCR (only on p16-positive)                |
| Olmsted <i>et al.</i> , 2016 [55]  | USA         | III | 35              | ES (31)<br>Ab (1)<br>B (1)<br>MC (1)          | M (16)<br>F (19) | 14                                                | FIV (2.9%)                     | Only referred sanitary status                  |

|                                    |       |     |     |                                                        |                  |         |                                                                                    |                               |
|------------------------------------|-------|-----|-----|--------------------------------------------------------|------------------|---------|------------------------------------------------------------------------------------|-------------------------------|
| Altamura <i>et al.</i> , 2016 [26] | Italy | IV  | 1   | ES (1)                                                 | ND               | Sen (1) | FcaPV-2 (100%)                                                                     | PCR; IHC (p53 and pRb)        |
| Altamura <i>et al.</i> , 2022 [37] | Italy | III | 113 | ES (113)                                               | ND               | ND      | FcaPV-1 (6.2%)<br>FcaPV-2(7.5%)<br>FcaPV-3(5.3%)<br>FcaPV-4(0.9%)<br>FcaPV-5(1.8%) | PCR                           |
| Zaccone <i>et al.</i> , 2021 [73]  | Italy | III | 100 | Ch (5)<br>S (2)<br>P (1)<br>MC (1)<br>K (1)<br>ES (90) | M (46)<br>F (54) | ND      | FeLV (0%)<br>FIV (8%)                                                              | Only referred sanitary status |

M – Male; F – Female; PV – Papillomavirus; IHC – Immunohistochemistry; PCR – Polymerase chain reaction; RT-PCR – Reverse transcription PCR; ISH – *in situ* hybridization; FcaPV – *Felis catus* papillomavirus; FFV – *Feline foamy virus*; FTTV – *Feline torque teno virus*; EBV – *Epsteinn-Barr virus*; FHV – Feline herpesvirus; FIV – Feline immunodeficiency virus; FeLV – *Feline Leukemia virus*; HPV – Human Papillomavirus; H – Himalayan; ES – European Shorthair; S – Siamese; A – Angorá; Pe – Persian; Ab – Abyssinian; B – Bengal; J – Júnior; Ad – Adult; AdMa – Adult Mature; Sen – Senior; G – Geriatric; ND – No data; USA – United States of America.<sup>a</sup> – 18 cats with FOSCC without specific location.

**Table S3.** Data collection related to environmental tobacco smoke.

| Reference                         | Geographic location | Level of evidence | Cats with FOSCC (n)  | Breed (n)                                              | Gender (n)       | Animals' lifespan (n)          | Exposure to EST (% of animals; RR; <i>p</i> ) |
|-----------------------------------|---------------------|-------------------|----------------------|--------------------------------------------------------|------------------|--------------------------------|-----------------------------------------------|
| Bertone <i>et al.</i> , 2003 [14] | USA                 | III               | 36                   | ES (34)<br>Purebred (2)                                | M (16)<br>F (20) | AdMa (4)<br>Sen (21)<br>G (11) | E (36.1%; 2.3; 0.11)<br>NE (61.1%; 1.0; -)    |
| Snyder <i>et al.</i> , 2004 [12]  | USA                 | III               | 23                   | ND                                                     | M (16)<br>F (17) | ND                             | E (47.8%; 4.5; 0.19)<br>NE (52.2%; 1.0; -)    |
| Renzi <i>et al.</i> , 2019 [13]   | Italy               | III               | 24 <sup>b</sup> (26) | ES (22)<br>Ch (2)<br>S (1)<br>Per (1)                  | M (12)<br>F (14) | 14.5                           | E (25.0%; -; -)<br>NE (75.0%; -; -)           |
| Zaccone <i>et al.</i> , 2021[73]  | Italy               | III               | 100                  | Ch (5)<br>S (2)<br>P (1)<br>MC (1)<br>K (1)<br>ES (90) | M (46)<br>F (54) | ND                             | E (31%; -; -)<br>NE (69%; -; -)               |

ES – European Shorthair; Ch – Chartreux; S – Siamese; Persa – Persian; M – Male; F – Female; E – Exposed; NE – Not exposed; P – Positive; N – Negative; Ad – Adult; AdMa – Adult Mature; Sen – Senior; G – Geriatric; ND - No data; RR – Relative risk; *p* – significance level; USA – United States of America. <sup>b</sup>

Information about smoke exposure is only available in 24 out of 26 cats.

**Table S4.** Data collection related to oral comorbidities and other risk factors.

| Reference<br>(author, year<br>of<br>publication) | Geograph<br>ic location | Level of<br>evidence | Cats with<br>FOSCC<br>(n) | Breed<br>(n)        | Gender<br>(n)    | Animals'<br>lifespan<br>(n)    | Flea control<br>product<br>(% animals;<br>RR, <i>p</i> )                                                                                                             | Diet<br>(% animals;<br>RR; <i>p</i> )                                                                                                                                                                                  | Oral<br>comorbidities<br>(% animals; RR;<br><i>p</i> ) | Other risk<br>factors<br>(% animals; RR;<br><i>p</i> )                                                                                                                                                                                                                                                                                                 |
|--------------------------------------------------|-------------------------|----------------------|---------------------------|---------------------|------------------|--------------------------------|----------------------------------------------------------------------------------------------------------------------------------------------------------------------|------------------------------------------------------------------------------------------------------------------------------------------------------------------------------------------------------------------------|--------------------------------------------------------|--------------------------------------------------------------------------------------------------------------------------------------------------------------------------------------------------------------------------------------------------------------------------------------------------------------------------------------------------------|
| Bertone <i>et al.</i> ,<br>2003 [14]             | USA                     | III                  | 36                        | ES (34)<br>Pure (2) | M (16)<br>F (20) | AdMa (4)<br>Sen (21)<br>G (11) | Never<br>(38.9%; 1.0;-)<br>Collar<br>(36.1%; 5.3;<br>0.002)<br>Shampoo<br>(5.6%; 0.1;<br>0.011)<br>Powder<br>(13.9%; 1.7;<br>0.42)<br>Spray<br>(13.9%; 1.2;<br>0.81) | Dry<br>(27.7%;1.0;-)<br>Canned<br>(55.5%; 3.6;<br>0.014)<br>Dry and<br>canned<br>(16.7%; 2.2;<br>0.27)<br>Canned tuna<br>(41.7%; 4.7;<br>0.004)<br>Table scraps<br>(44.4%; 1.2;<br>0.87)<br>Liver (2.8%;<br>0.3; 0.30) | Dental<br>pathology<br>(33.3%; 1.8; 0.18)              | City (13.9%; 0.4;<br>0.067)<br>Small town<br>(55.5%; 1.0; -)<br>Rural (27.7%;<br>0.7; 0.52)<br>WS city (33.3%;<br>1.0: -) Other WS<br>(63.9%; 0.6; 0.23)<br>HS gas (2.8%;<br>0.4; 0.12)<br>HS wood<br>(30.6%; 0.8; 0.65)<br>HS oil (19.4%;<br>0.8; 0.61)<br>HS coal (61.1%;<br>0.9; 0.90)<br>Grooming (7%;<br>1.3; 0.58)<br>Bathing (2%; 0.5;<br>0.16) |
| Snyder <i>et al.</i> ,<br>2004 [12]              | USA                     | III                  | 23                        | -                   | M (16)<br>F (17) | ND                             | Never<br>(34.8%; 1.0)                                                                                                                                                | Dry (21.7%;<br>1.0)                                                                                                                                                                                                    | -                                                      | -                                                                                                                                                                                                                                                                                                                                                      |

|                                     |                   |     |    |                                                |                  |                              | Collar<br>(43.5%; 0.7;<br>0.21)<br>Shampoo<br>(0) Other<br>(21.7%; -; -) | Canned<br>(43.49%; 0.7;<br>0.99)<br>Canned tuna<br>(52.2%; 1.1;<br>0.99) |                                                                       |                 |
|-------------------------------------|-------------------|-----|----|------------------------------------------------|------------------|------------------------------|--------------------------------------------------------------------------|--------------------------------------------------------------------------|-----------------------------------------------------------------------|-----------------|
| Pavlin <i>et al.</i> ,<br>2018 [56] | Slovenia          | V   | 1  | ES (1)                                         | M (0)<br>F (1)   | Sen (1)                      | -                                                                        | -                                                                        | Periodontal<br>disease; Tooth<br>resorption;<br>Dental loss<br>(100%) | Dental plaque   |
| Olmsted <i>et al.</i> , 2016 [55]   | USA               | III | 35 | ES (31)<br>Ab (1)<br>B (1)<br>MC (1)<br>BN (1) | M (16)<br>F (19) | 14                           | -                                                                        | -                                                                        | Feline chronic<br>gingivostomatiti<br>s (2.8%)                        | -               |
| Hayes <i>et al.</i> ,<br>2007 [6]   | United<br>Kingdom | III | 54 | ES (50)<br>MC (1)<br>P (1)<br>Bu (1)           | M (29)<br>F (25) | 13.3                         | -                                                                        | -                                                                        | Dental<br>pathology<br>(31%)                                          | -               |
| Boston <i>et al.</i> ,<br>2018 [74] | USA               | II  | 7  | ES (6)<br>BN (1)                               | M (4)<br>F (3)   | AdMa (1)<br>Sen (3)<br>G (3) | -                                                                        | -                                                                        | Dental loss<br>(14.3%)                                                | -               |
| Quigley <i>et al.</i> ,<br>1972[68] | United<br>Kingdom | IV  | 4  | -                                              | M (2)<br>F (2)   | AdMa (1)<br>Sen (3)          | -                                                                        | -                                                                        | Osteosarcoma<br>(50%)                                                 | Dental residues |

|                                  |       |     |     |                            |                  |          |                                                                                    |                                                                                                          |                                |                                                                                                                                                          |
|----------------------------------|-------|-----|-----|----------------------------|------------------|----------|------------------------------------------------------------------------------------|----------------------------------------------------------------------------------------------------------|--------------------------------|----------------------------------------------------------------------------------------------------------------------------------------------------------|
| Moisan <i>et al.</i> , 1998 [54] | USA   | V   | 1   | ES (1)                     | M (1)            | AdMa (1) | -                                                                                  | -                                                                                                        | <i>Trichinella</i> spp. (100%) | -                                                                                                                                                        |
| Zacone <i>et al.</i> , 2021 [73] | Italy | III | 100 | Purebred (10%)<br>ES (90%) | M (46)<br>F (54) | ND       | Collar (3%;<br>;0.01)<br>Oral products (4%;<br>;-)<br>Spot - on drops (59%;<br>;-) | Dry (32%)<br>Canned tuna (63%)<br>Table scraps (20%)<br>Food with high chemical additives(80%;<br>;0.01) | Oral inflammation (34%)        | Trivalent vaccine occasional (52%)<br>Trivalent vaccine regular (36%)<br>Cohabitation with other cats (63%)<br>Rural living environment(37%;<br>;-;0.04) |

ES – European Shorthair; S – Siamese; P – Persian; M – Male; F – Female; MC – Main Coon; BQ – Norwegian Forest Cat; B – Bengal; Bu – Bumese; Ab – Abyssinian; AdMa – Adult Mature; Sen – Senior; G – Geriatric; HS – Heat Source; WS – Water Source; RR – Relative risk; *p* – significance level; USA – United States of America. <sup>c</sup> – Possibility of choosing more than one option.



**Table S5.** Results of quality assessment using Downs and Black score.

| Reference                           | Score | Reference                           | Score |
|-------------------------------------|-------|-------------------------------------|-------|
| Chu <i>et al.</i> , 2019[34]        | 7     | Altamura <i>et al.</i> , 2018 [27]  | 4     |
| Gendler <i>et al.</i> , 2010 [47]   | 6     | Munday <i>et al.</i> , 2015 [17]    | 3     |
| Yamashita <i>et al.</i> , 2018 [32] | 6     | Munday <i>et al.</i> , 2019 [23]    | 5     |
| Altamura <i>et al.</i> , 2020 [35]  | 6     | Hoggard <i>et al.</i> , 2018 [33]   | 5     |
| O'Neill <i>et al.</i> , 2011 [24]   | 5     | Anis <i>et al.</i> , 2010 [36]      | 4     |
| Munday <i>et al.</i> , 2009 [29]    | 4     | Hutson <i>et al.</i> , 1991 [72]    | 4     |
| Munday <i>et al.</i> , 2011 [30]    | 5     | Supsavhad <i>et al.</i> , 2016 [31] | 3     |
| Olmsted <i>et al.</i> , 2016 [55]   | 8     | Renzi <i>et al.</i> , 2019 [13]     | 6     |
| Altamura <i>et al.</i> , 2016 [26]  | 5     | Pavlin <i>et al.</i> , 2018 [56]    | 5     |
| Bertone <i>et al.</i> , 2003 [14]   | 6     | Hayes <i>et al.</i> , 2007 [6]      | 6     |
| Snyder <i>et al.</i> , 2004 [12]    | 5     | Boston <i>et al.</i> , 2018 [74]    | 6     |
| Quigley <i>et al.</i> , 1972 [68]   | 4     | Altamura <i>et al.</i> , 2020[35]   | 7     |
| Moisan <i>et al.</i> , 1998 [54]    | 4     | Zaccone <i>et al.</i> , 2021 [73]   | 6     |
